# Supplementary material for: Reconstructing the Phylogenetic History of Long-Term Effective Population Size and Life-History Traits Using Patterns of Amino Acid Replacement in Mitochondrial Genomes of Mammals and Birds
Source: PubMed Central journal article supplement — Genome Biol Evol. 2013 May 27;5(7):1273–90. doi: 10.1093/gbe/evt083 (PMC3730341; doi:10.1093/gbe/evt083), 2013-05-27
Supplement: supp_evt083_Supplementary_material.pdf [file supp_evt083_Supplementary_material.pdf]

Table S1 : Fossil calibrations

| Dataset | Node                                         | Maximum age (My) | Minimum age (My) | References           |
|---------|----------------------------------------------|------------------|------------------|----------------------|
| Birds   | Paleognathae / Neognathae                    | 86.5             | 66               | Benton et al. (2009) |
|         | <i>Acanthisitta</i> / other<br>Passeriformes | 65               | –                | Benton et al. (2009) |
|         | Sphenisciformes /<br>Procellariiformes       | –                | 62               | Slack et al. 2006    |
| Mammals | <i>Pan</i> / <i>Homo</i>                     | 10               | 5.7              | Benton et al. (2009) |
|         | <i>Pan</i> / <i>Hylobates</i>                | 33.7             | 11.2             | Benton et al. (2009) |
|         | Cercopithecoidea<br>/<br>Hominoidea          | 34               | 23.5             | Benton et al. (2009) |
|         | lemuriforms<br>/ other Primates              | 65.8             | 55.6             | Benton et al. (2009) |
|         | Feliformia / Caniformia                      | 65.8             | 39.7             | Benton et al. (2009) |
|         | Suidae / Cetacea                             | 65.8             | 52.4             | Benton et al. (2009) |
|         | Eulipotyphlans<br>/ other Laurasiatheria     | 131.5            | 62.5             | Benton et al. (2009) |
|         | Ochotoma / other Lagomorpha                  | 65.8             | 48.6             | Benton et al. (2009) |
|         | sciuriforms / Caviomorpha +<br>Myomorpha     | 65.8             | 55.6             | Benton et al. (2009) |
|         | Caviomorpha /<br>Myomorpha                   | 58.9             | 52.5             | Benton et al. (2009) |
|         | <i>Rattus</i> / <i>Mus</i>                   | 14               | 10.4             | Benton et al. (2009) |
|         | Macroscelidea / Proboscidea                  | 131.5            | 48.4             | Benton et al. (2009) |
|         | Afrotheria / other placentalia               | 131.5            | 62.5             | Benton et al. (2009) |

Table S2 : Covariance between Kr/Kc and LHTs using the alternative birds topology of Hackett et al. 2008. The correlations without control (–) or controlling for base composition, . Change in polarity and volume are considered as radical substitutions.

| Control             | Body mass      | Longevity   | Sexual maturity |
|---------------------|----------------|-------------|-----------------|
| –                   | 0.39 (0.99)**  | 0.32 (0.91) | 0.11 (0.62)     |
| $\pi_c$ and $\pi_r$ | 0.45 (>0.99)** | 0.35 (0.92) | 0.23 (0.80)     |
| GC bias, AT/GC skew | 0.43 (>0.99)** | 0.33 (0.91) | 0.23 (0.80)     |

\* indicates  $pp > 0.95$  or  $< 0.05$ \*\* indicates  $pp < 0.025$  or  $> 0.975$

Table S3 : Covariance between Kr/Kc and LHTs excluding ND6. The correlations without control (–) or controlling for base composition. Change in polarity and volume are considered as radical substitutions.

| Datasets         | Control                           | Body mass      | Longevity      | Sexual maturity |
|------------------|-----------------------------------|----------------|----------------|-----------------|
|                  | –                                 | 0.35 (>0.99)** | 0.42 (>0.99)** | 0.63 (>0.99)**  |
| Placentals (All) |                                   |                |                |                 |
|                  | p <sub>c</sub> and p <sub>r</sub> | 0.30 (>0.99)** | 0.44 (>0.99)** | 0.51 (0.99)**   |
|                  | GC bias, AT/GC skew               | 0.32 (>0.99)** | 0.34 (0.98)**  | 0.530 (>0.99)** |
|                  | –                                 | 0.36 (0.98)**  | 0.29 (0.89)    | 0.08 (0.60)     |
| Birds            |                                   |                |                |                 |
|                  | p <sub>c</sub> and p <sub>r</sub> | 0.40 (0.99)**  | 0.32 (0.90)    | 0.20 (0.77)     |
|                  | GC bias, AT/GC skew               | 0.37 (0.98)**  | 0.29 (0.88)    | 0.19 (0.77)     |

\* indicates  $pp > 0.95$  or  $< 0.05$

\*\* indicates  $pp < 0.025$  or  $> 0.975$

## References

- Benton MJ, Donoghue PCJ, Asher RJ. 2009. Calibrating and constraining molecular clocks. *Timetree Life*:35–86.
- Slack KE, Jones CM, Ando T, Harrison GLA, Fordyce RE, Arnason U, Penny D. 2006. Early penguin fossils, plus mitochondrial genomes, calibrate avian evolution. *Mol. Biol. Evol.* 23:1144–1155.
