# Supplementary figures and images for: Reconstructing the Phylogenetic History of Long-Term Effective Population Size and Life-History Traits Using Patterns of Amino Acid Replacement in Mitochondrial Genomes of Mammals and Birds
Source: PubMed Central journal article supplement — Genome Biol Evol. 2013 May 27;5(7):1273–90. doi: 10.1093/gbe/evt083 (PMC3730341; doi:10.1093/gbe/evt083), 2013-05-27

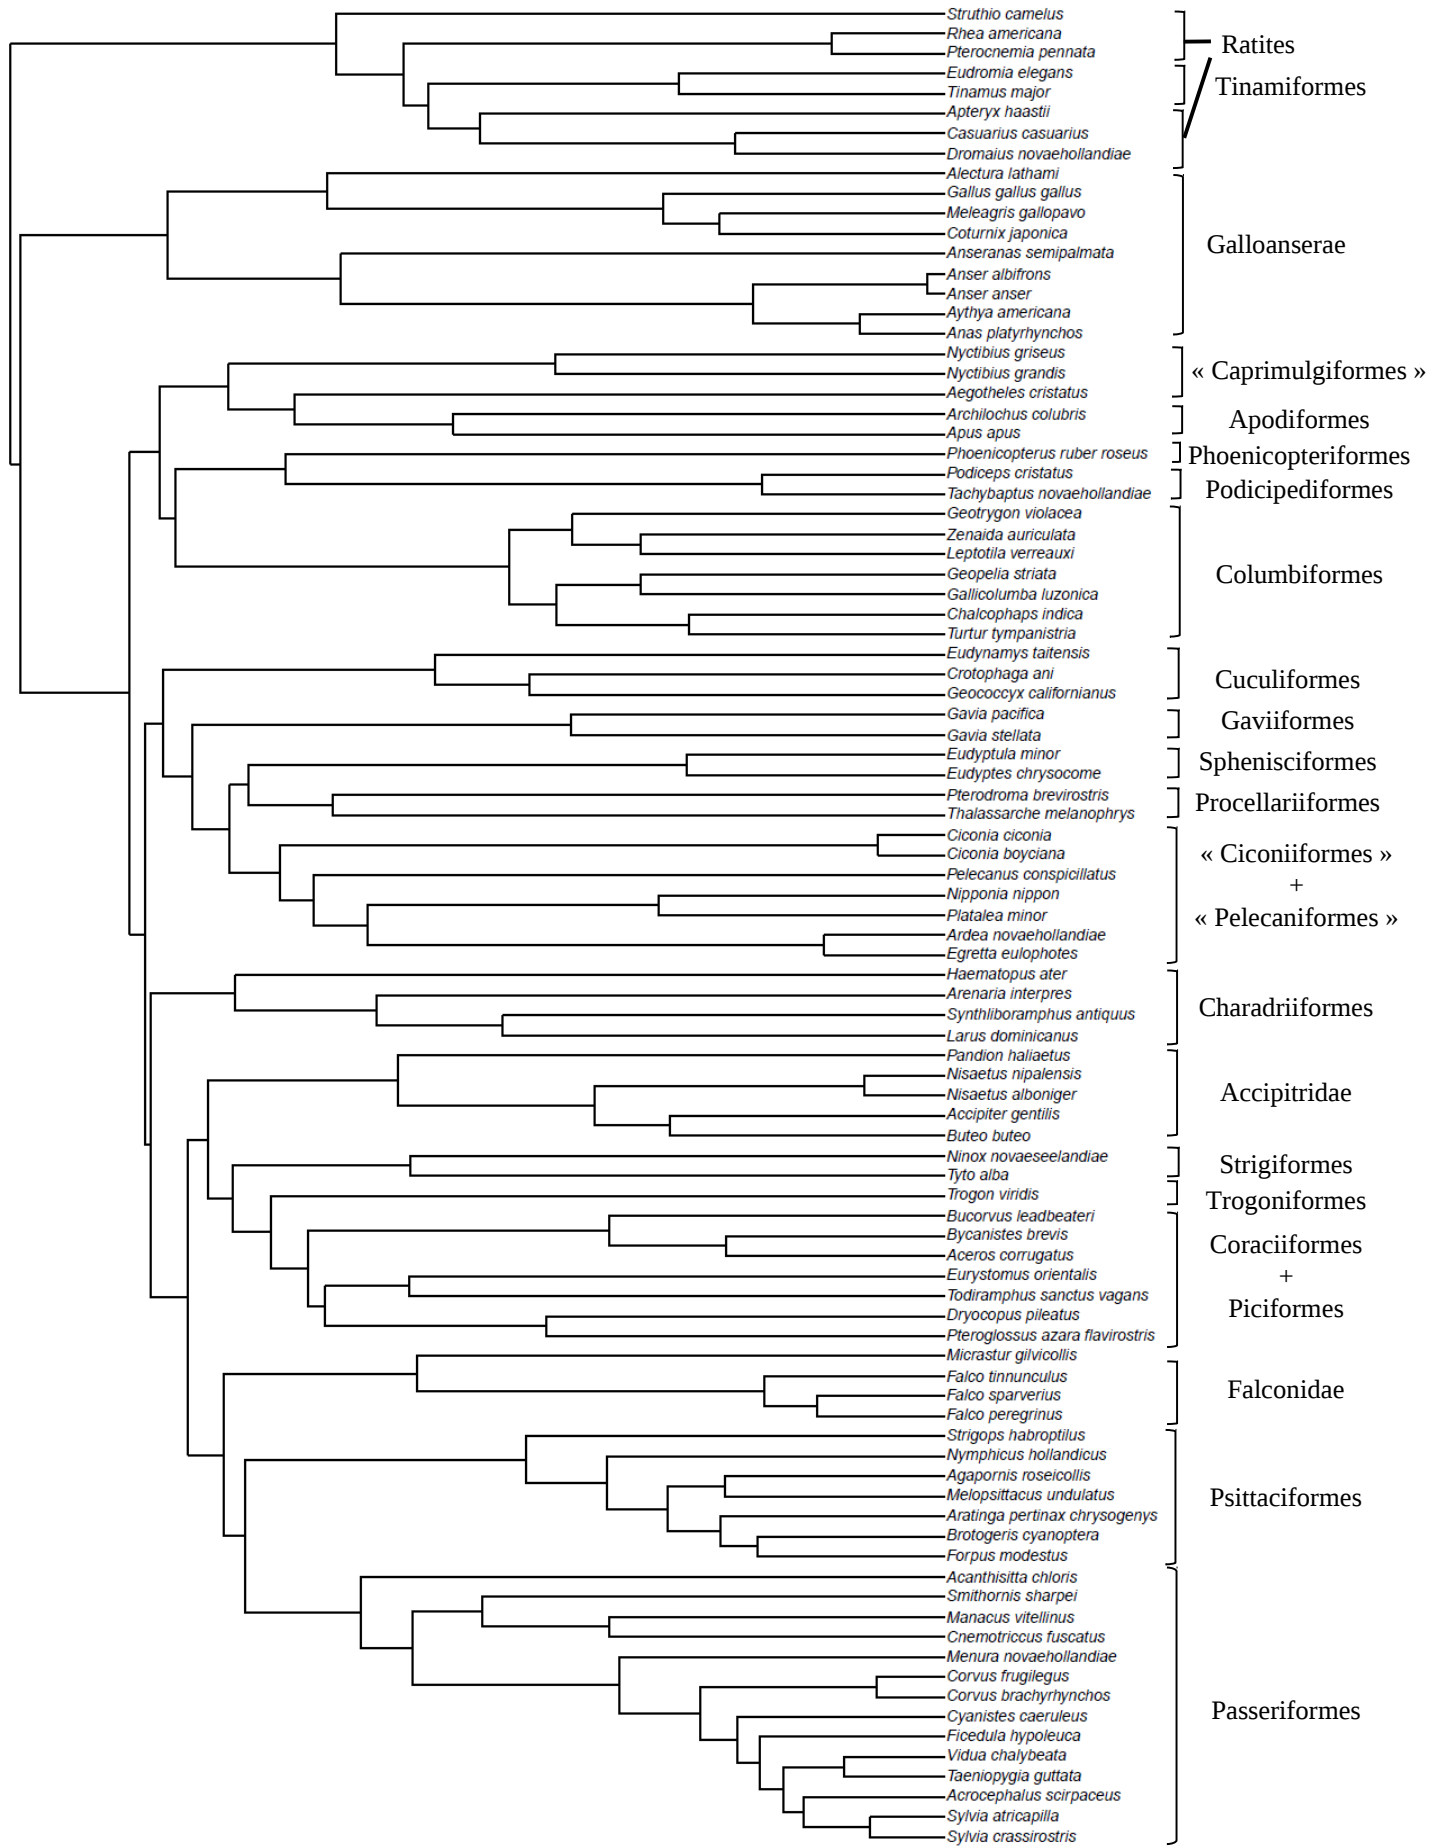

Supplement: supp_evt083_FigS1_Hackett_topo.pdf [file supp_evt083_FigS1_Hackett_topo.pdf]

## Birds

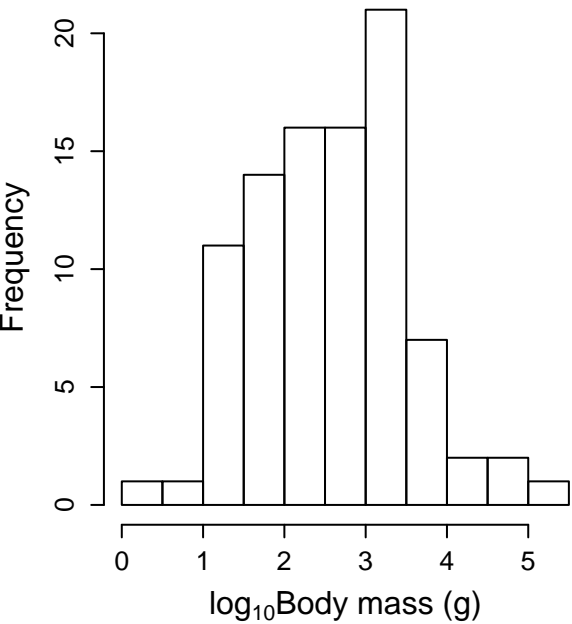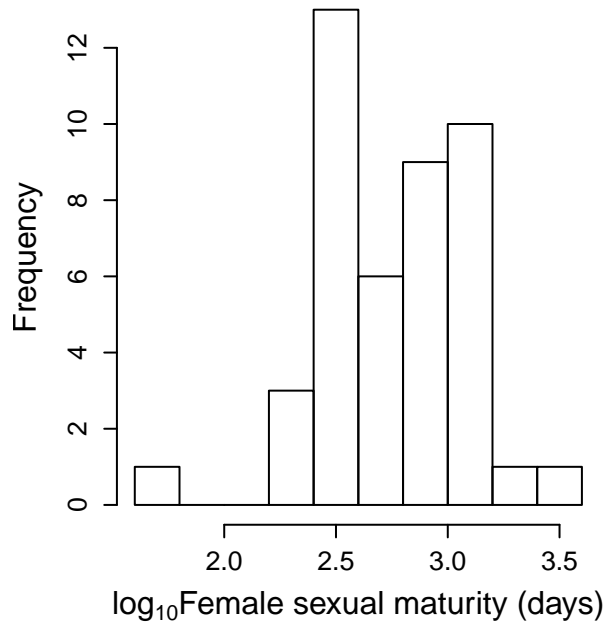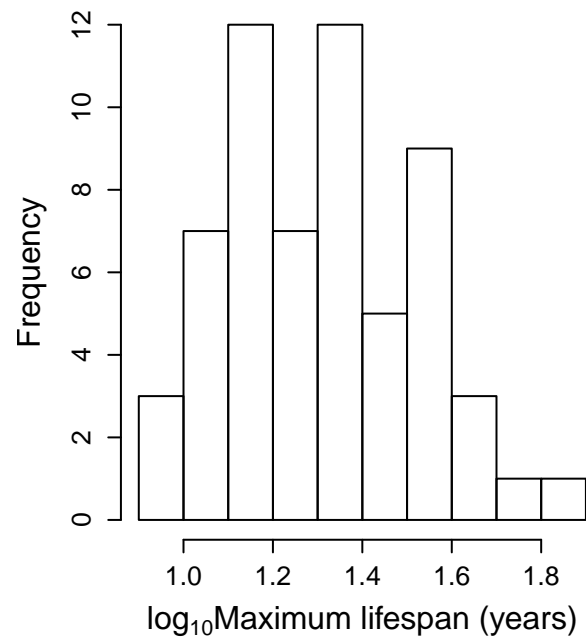

## Placentalia

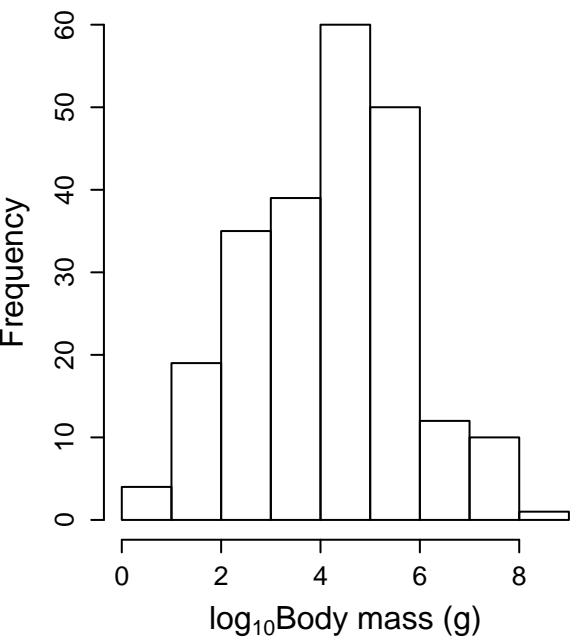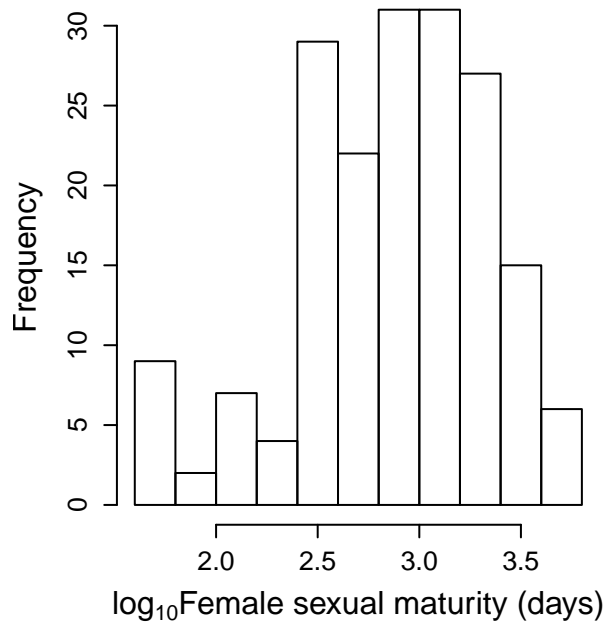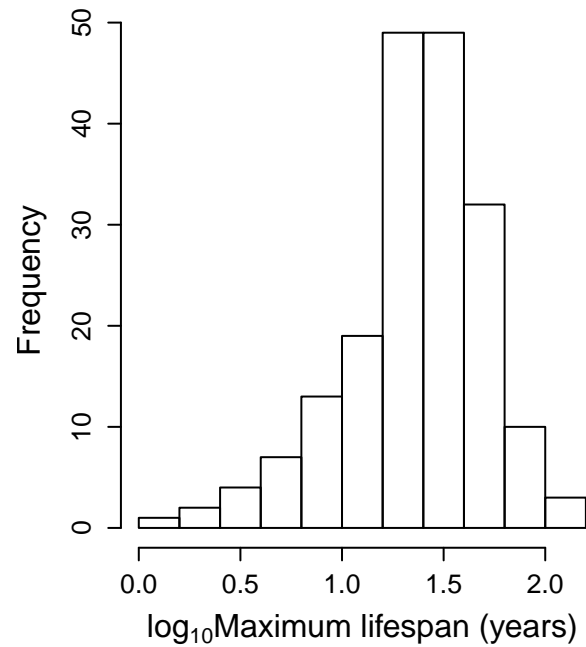

Supplement: supp_evt083_FigS2_Hist_LHT.pdf [file supp_evt083_FigS2_Hist_LHT.pdf]

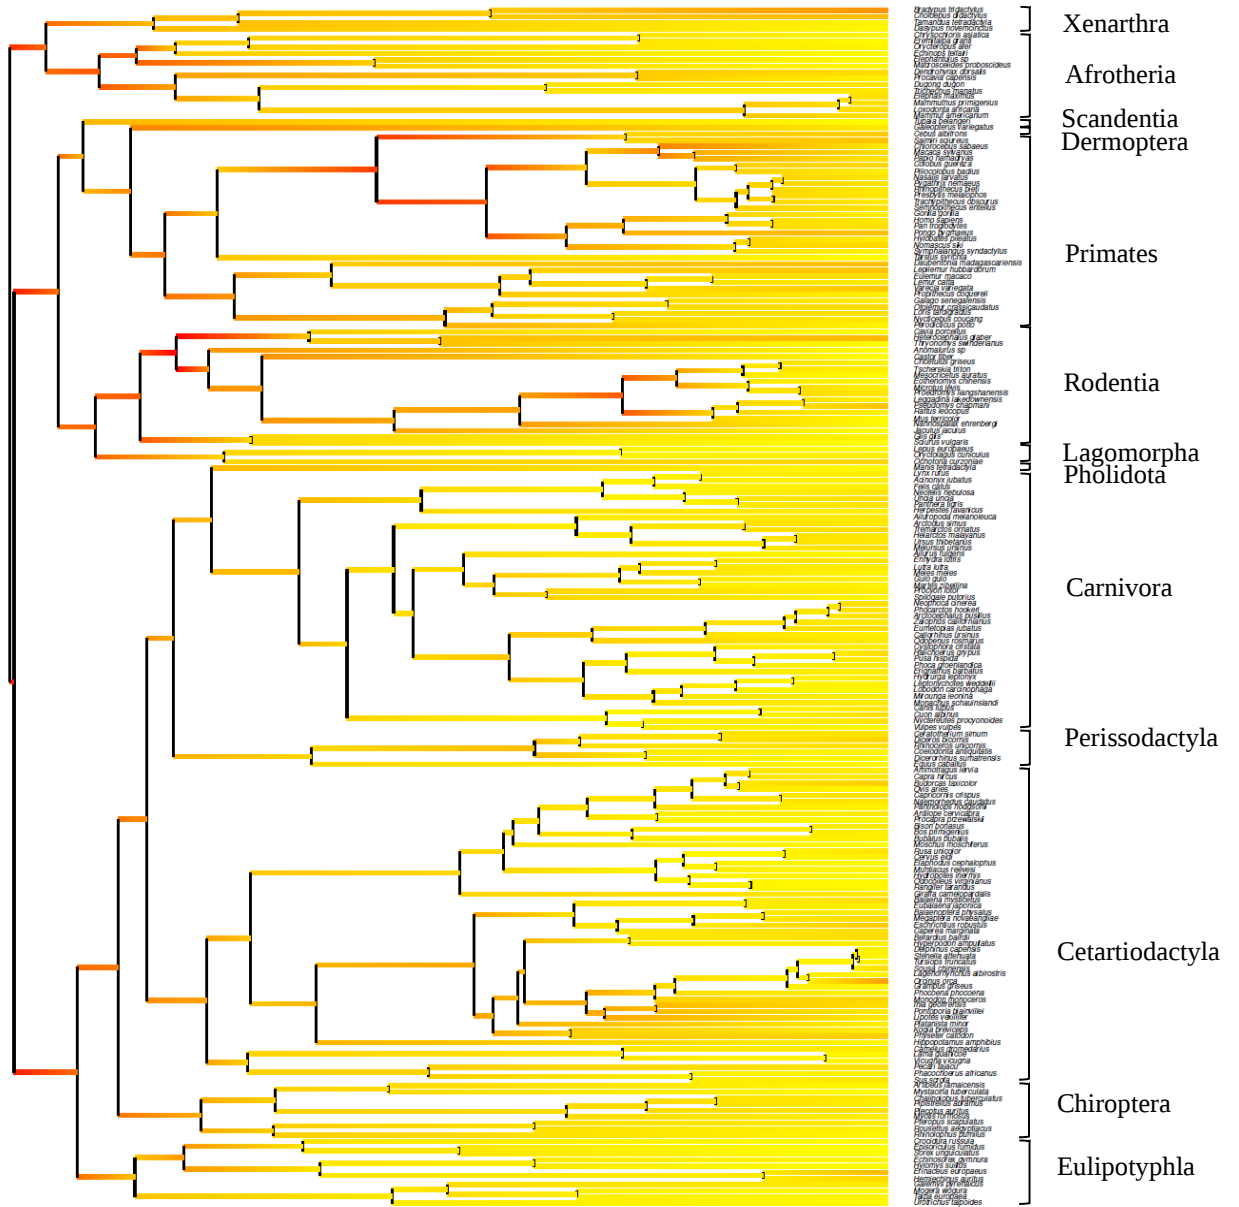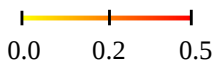

Supplement: supp_evt083_FigS3.pdf [file supp_evt083_FigS3.pdf]

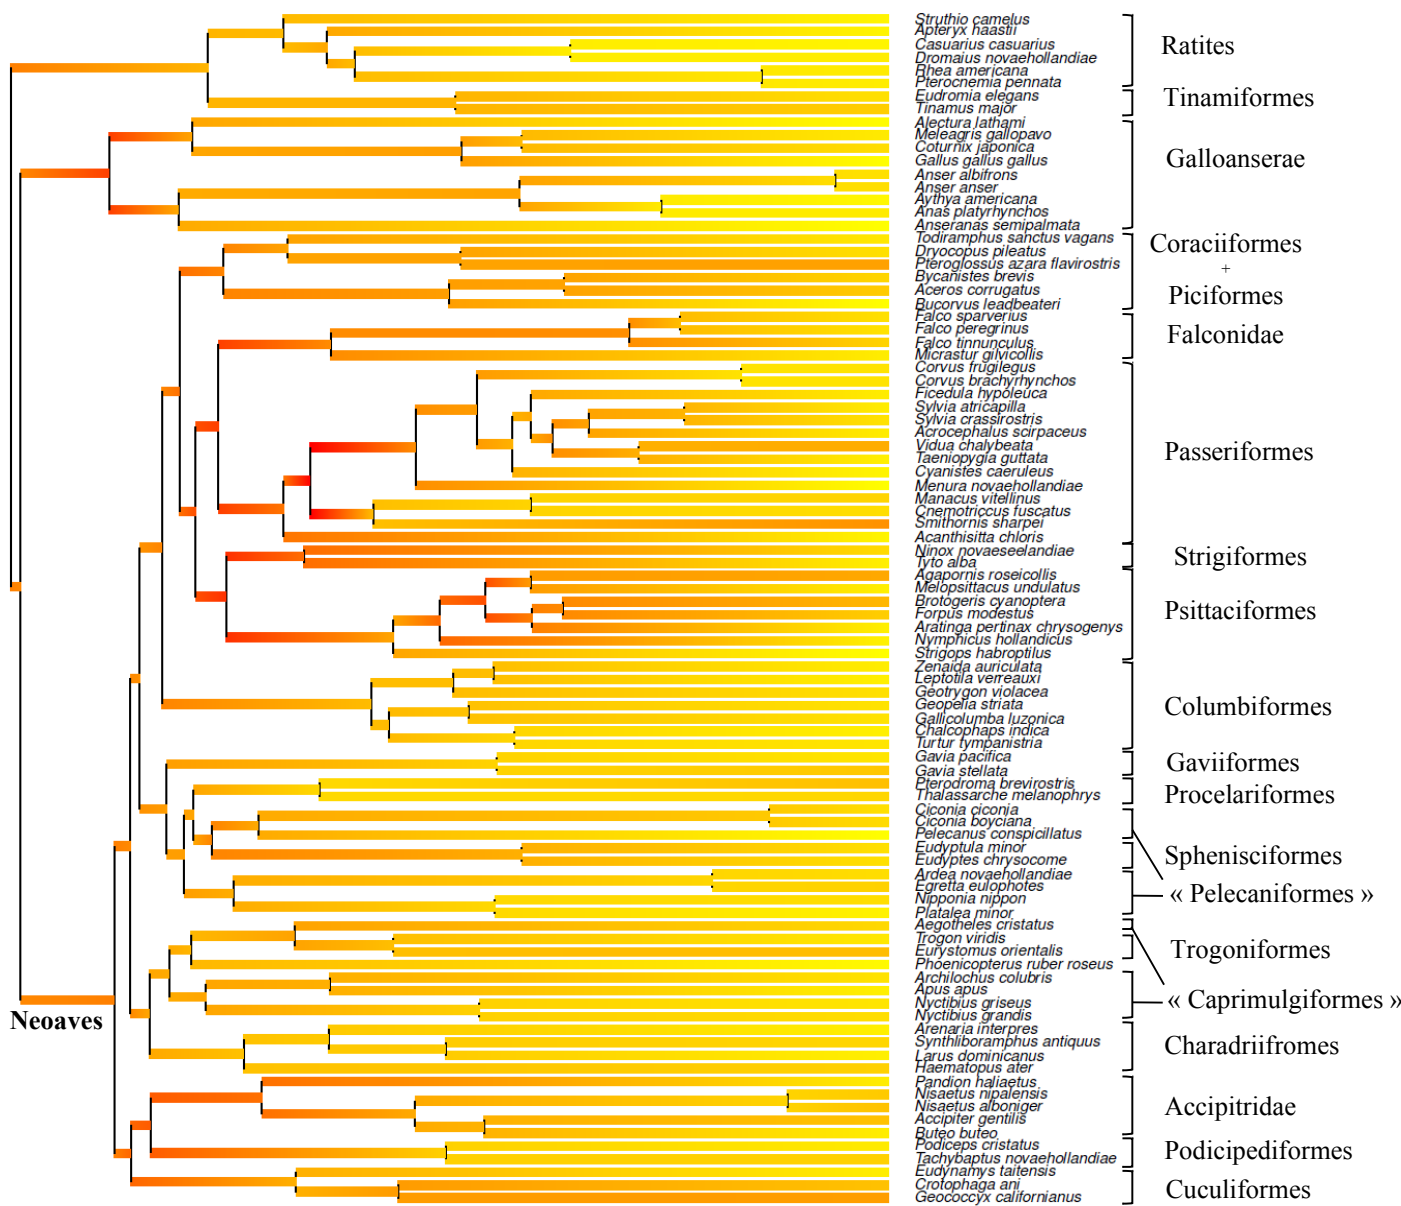

Supplement: supp_evt083_FigS4.pdf [file supp_evt083_FigS4.pdf]
